# Supplementary material for: Baseline correction for Raman spectra using an improved asymmetric least squares method
Source: Royal Society of Chemistry journal article supplement (doi:10.1039/c4ay00068d), 2014-01-01
Supplement: c4ay00068d1.pdf [file c4ay00068d1.pdf]

1 Electronic Supplementary Information (ESI)

2

3 Baseline Correction for Raman Spectra Using Improved Asymmetric Least Squares

4

5 Shixuan He, Wei Zhang\*, Lijuan Liu, Yu Huang, Jiming He, Wanyi Xie, Peng Wu  
6 and Chunlei Du

7

8 Key Laboratory of Multi-scale Manufacturing Technology, Chongqing Institute of  
9 Green and Intelligent Technology, Chinese Academy of Sciences, Chongqing, P. R.  
10 China, 400714

11 \*Corresponding author, E-mail address: zhangwei@cigit.ac.cn

12

13 **Choosing of suitable values for parameters.** For each pair of parameters ( $p$ ,  $\lambda_1$   
14 and  $\lambda$ ), a baseline was estimated and the *RMSE* of the proposed method was  
15 computed. Figure 1S shows that the performance of IAsLS while varying the  
16 parameters  $\lambda_1$  and  $\lambda$ ,  $p$  keeps unchanged otherwise, say  $p = 0.001$ . It is found  
17 that, when  $\lambda_1 \leq 10^{-4}$ , the *RMSE* performance is affected very little with the choice of  
18 parameter  $\lambda_1$ . And then, the *RMSE* reaches its minimum value when the value of  $\lambda$   
19 is up to  $\lambda = 10^5$ . Finally, the baseline estimated is shown in Figure S2. Figure S3  
20 shows that the performance of IAsLS while varying the parameter  $p$ , whereas  $\lambda_1$   
21 and  $\lambda$  keep unchanged simultaneously, say  $\lambda = 10^5$ ,  $\lambda_1 = 10^{-4}$ . And the baseline  
22 estimated with the more appropriate parameters is shown in Figure S4. The simulation  
23 shows that, in order to obtain the optimal performance, the value of  $p$  should be set  
24 to less than 0.1, and the range of  $\lambda$  value to  $10^2$  to  $10^6$ , and the range of  $\lambda_1$  value to  
25 less than  $10^{-4}$ .

---

Abbreviations: IAsLS, Improved asymmetric least square; AsLS, Asymmetric least square; RMSE, Root Mean Square Error; JAsLS, Jiang's asymmetric least square baseline correction method

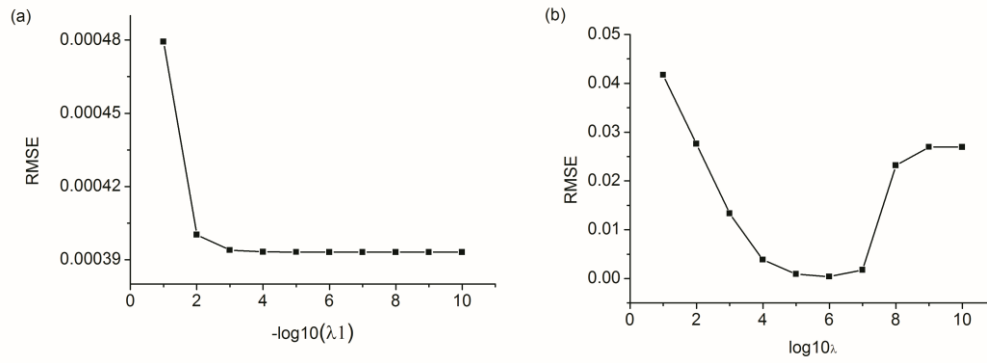

26

27 Figure S1 The *RMSE* of the IAsLS method when varying the parameters  $\lambda_1$  and  $\lambda_2$ ,

28  $p = 0.001$

29

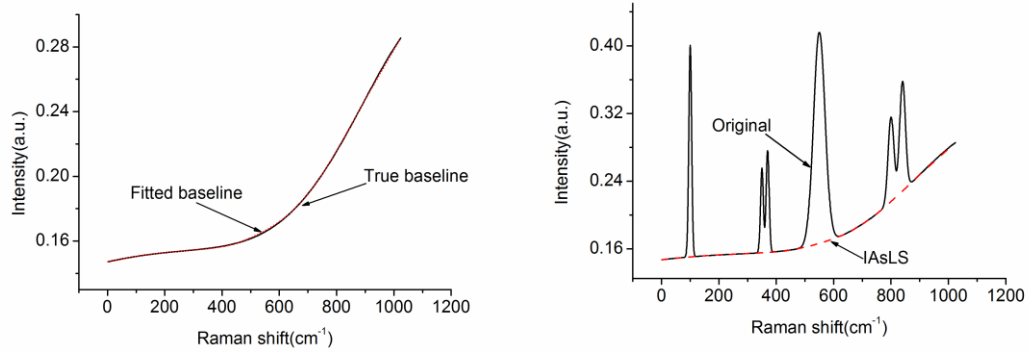

30

31 Figure S2 Baseline correction result based on the IAsLS method ( $p = 0.001, \lambda = 10^5$ ,

32  $\lambda_1 = 10^{-4}, RMSE = 0.0004$ )

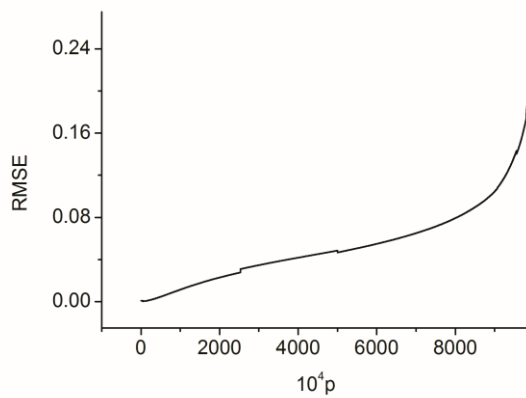

33

34 Figure S3 The *RMSE* of the IAsLS method when varying the parameter  $p$ ,  $\lambda = 10^5$ ,

35  $\lambda_1 = 10^{-4}$

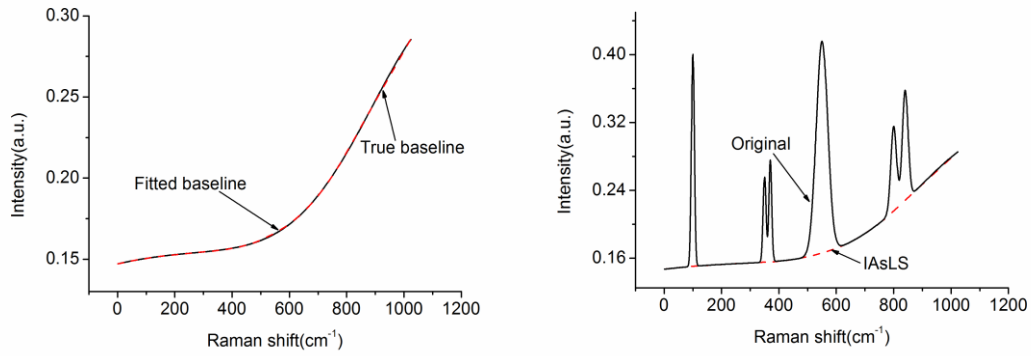

36

37 Figure S4 Baseline correction result based on the IAsLS method ( $\lambda = 10^5$ ,  $\lambda_1 = 10^{-4}$ ,  
 38  $p = 0.0043$ ,  $RMSE = 0.00036$ )

39 **Results for the three baseline correction methods.** Figure S5 and Figure S6 show  
 40 that the effect of the three baseline correction methods on spectra for dimethoate  
 41 solution and solid Rhodamine6G respectively. The results show that IAsLS is able to  
 42 remove the fluorescence signal better comparing with the other two methods (Figure  
 43 S5-S6), but not over-fitted. Above all, both of these irrelevant spectral disturbances  
 44 can be removed well by the IAsLS baseline correction.

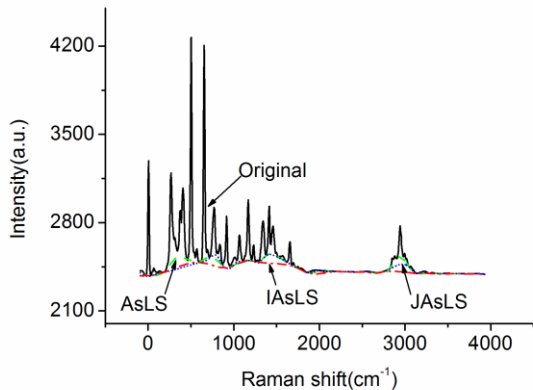

45

46 FigureS5 Original spectrum and the results of baseline correction methods for  
 47 dimethoate solution ( $\lambda = 10^2$ ,  $\lambda_1 = 10^{-5}$ ,  $p = 0.001$ )

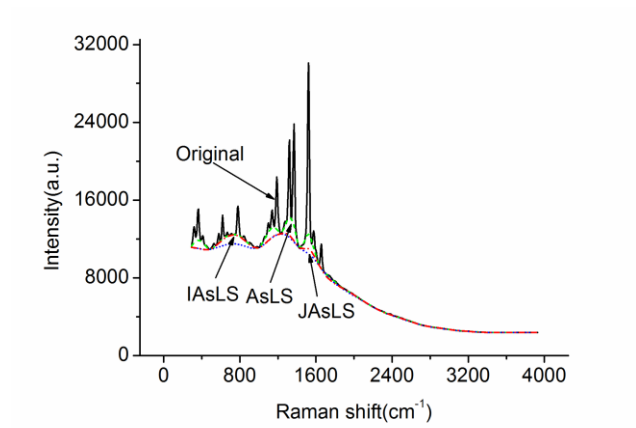

48

49 Figure S6 Original spectrum and the results of baseline correction methods for solid

50 Rhodamine6G ( $\lambda = 10^2$ ,  $\lambda_1 = 10^{-5}$ ,  $p = 0.01$ )
